# Supplementary material for: Hepatitis C Virus Induces Regulatory T Cells by Naturally Occurring Viral Variants to Suppress T Cell Responses
Source: Hindawi journal article supplement (doi:10.1155/2011/806061), 2010-12-06
Supplement: f1 [file 806061.f1.pdf]

**Supplementary Table 1. CD4<sup>+</sup> and CD8<sup>+</sup> CD127<sup>-</sup> expression**

| Subject |    | CD127 <sup>-</sup> |      |      |      |      |      |
|---------|----|--------------------|------|------|------|------|------|
|         |    | Medium             |      | NS3  |      | H3   |      |
|         |    | CD4                | CD8  | CD4  | CD8  | CD4  | CD8  |
| RLM 037 | R  | 60.1               | 28   | 65.1 | 32.9 | 62.1 | 28.9 |
| KML044  | R  | 37.6               | 23.6 | 46.4 | 29.7 | 42.3 | 24.7 |
| ZSS035  | R  | 38.7               | 14.1 | 26.2 | 9.72 | 42.5 | 17.9 |
| DOY041  | R  | 40.7               | 20.3 | 42.7 | 18.1 | 46.1 | 24.3 |
| LEC028  | R  | 48.7               | 30.8 | 54.6 | 26.8 | 51.8 | 34.7 |
| KTJ010  | R  | 28.7               | 8.1  | 38.5 | 11   | 26.4 | 7.62 |
| BPB026  | R  | 32.8               | 22   | 37.1 | 9.75 | 33.1 | 10.5 |
| DRB012  | R  | 41                 | 17.1 | 47.4 | 19.7 | 46.9 | 19   |
| JVP008  | R  | 35.9               | 15.4 | 42.4 | 19.7 | 34.2 | 16.2 |
| JPZ061  | R  | 38.6               | 18.7 | 44.6 | 27.9 | 45.5 | 27.3 |
| AJG066  | C  | 84                 | 62.8 | 84   | 63.3 | 83.2 | 60.7 |
| KRW002  | C  | 62.8               | 54.7 | 63.9 | 57.9 | 64.1 | 57.5 |
| MH065   | C  | 51                 | 54.7 | 44.7 | 45.5 | 51.7 | 56.8 |
| NLM049  | C  | 60.6               | 35.9 | 54.1 | 37.1 | 63.1 | 38.6 |
| CER014  | C  | 66.2               | 27.2 | 61   | 23.6 | 67   | 29.8 |
| SSB007  | C  | 59.2               | 33.3 | 52.9 | 23.8 | 61.1 | 35.9 |
| RLW027  | C  | 51.8               | 56.1 | 52.3 | 53.5 | 58.4 | 68   |
| P.1022  | NI | 12.2               | 10.3 | 40.4 | 30.1 | 26.2 | 18.4 |
| P.1163  | NI | 37.2               | 14   | 34.4 | 15.3 | 33.7 | 13.5 |
| P.1078  | NI | 25.3               | 23.9 | 28.4 | 23.5 | 27   | 26.3 |
| P.1127  | NI | 31                 | 20.1 | 24.6 | 12.1 | 25.1 | 13.7 |
| P.1031  | NI | 27.6               | 23.7 | 35.7 | 12.7 | 34.8 | 23.2 |

Frequency of CD4<sup>+</sup> CD127<sup>-</sup> and CD8<sup>+</sup> T CD127<sup>-</sup> cells in lymphocyte population when stimulated with rNS3 and H3 at 1 $\mu$ g/ml for days and analyzed by flow cytometry.

### Supplementary Table 2. CD4<sup>+</sup> CD127<sup>-</sup> CFSE<sup>low</sup> Foxp3<sup>+</sup>

|         |    | CD4 <sup>+</sup> CD127 <sup>-</sup> CFSE <sup>low</sup> Foxp3 <sup>+</sup> |       |      |
|---------|----|----------------------------------------------------------------------------|-------|------|
| Subject |    | Medium                                                                     | NS3   | H3   |
| RLM 037 | R  | 83.1                                                                       | 66    | 68.4 |
| KML044  | R  | 86.7                                                                       | 62    | 72.3 |
| ZSS035  | R  | 82.6                                                                       | 71.8  | 81.8 |
| LEC028  | R  | 79.3                                                                       | 84    | 85   |
| KTJ010  | R  | 47.4                                                                       | 57.7  | 41.9 |
| BPB026  | R  | 30.9                                                                       | 25    | 14.3 |
| DRB012  | R  | 61.4                                                                       | 46.4  | 46.4 |
| JVP008  | R  | 15.9                                                                       | 14.1  | 29.7 |
| JPZ061  | R  | 36.9                                                                       | 26.1  | 20.4 |
| AJG066  | C  | 52.3                                                                       | 66.6  | 57.2 |
| KRW002  | C  | 10.4                                                                       | 12.3  | 10.1 |
| MH065   | C  | 18.6                                                                       | 40.1  | 37.7 |
| P.B3019 | C  | 58.7                                                                       | 69.2  | 71.5 |
| NLM049  | C  | 16.5                                                                       | 16.9  | 31.7 |
| CER014  | C  | 18.6                                                                       | 40.1  | 37.7 |
| DRB051  | C  | 16.5                                                                       | 67    | 49.5 |
| SSB007  | C  | 12.3                                                                       | 17.3  | 10.9 |
| RLW027  | C  | 16.7                                                                       | 40.8  | 20   |
| P.1022  | NI | 0                                                                          | 26.8  | 8.2  |
| P.1163  | NI | 18.1                                                                       | 28    | 21   |
| P.1078  | NI | 14.1                                                                       | 5.178 | 8.68 |
| P.1070  | NI | 18.6                                                                       | 16.3  | 11.8 |
| P.1031  | NI | 16                                                                         | 0     | 7.69 |

Frequency of CD4<sup>+</sup> CD127<sup>-</sup> CFSE<sup>low</sup> Foxp3<sup>+</sup> cells in lymphocyte population when stimulated with rNS3 and H3 at 1 $\mu$ g/ml for days and analyzed by flow cytometry.
